# Supplementary material for: Metabolomic profiling of human lung tumor tissues – nucleotide metabolism as a candidate for therapeutic interventions and biomarkers
Source: PubMed Central journal article supplement (PMC6165994; doi:10.1002/1878-0261.12369), 2018-09-13
Supplement: MOL2-12-1778-s003.pdf [file MOL2-12-1778-s003.pdf]

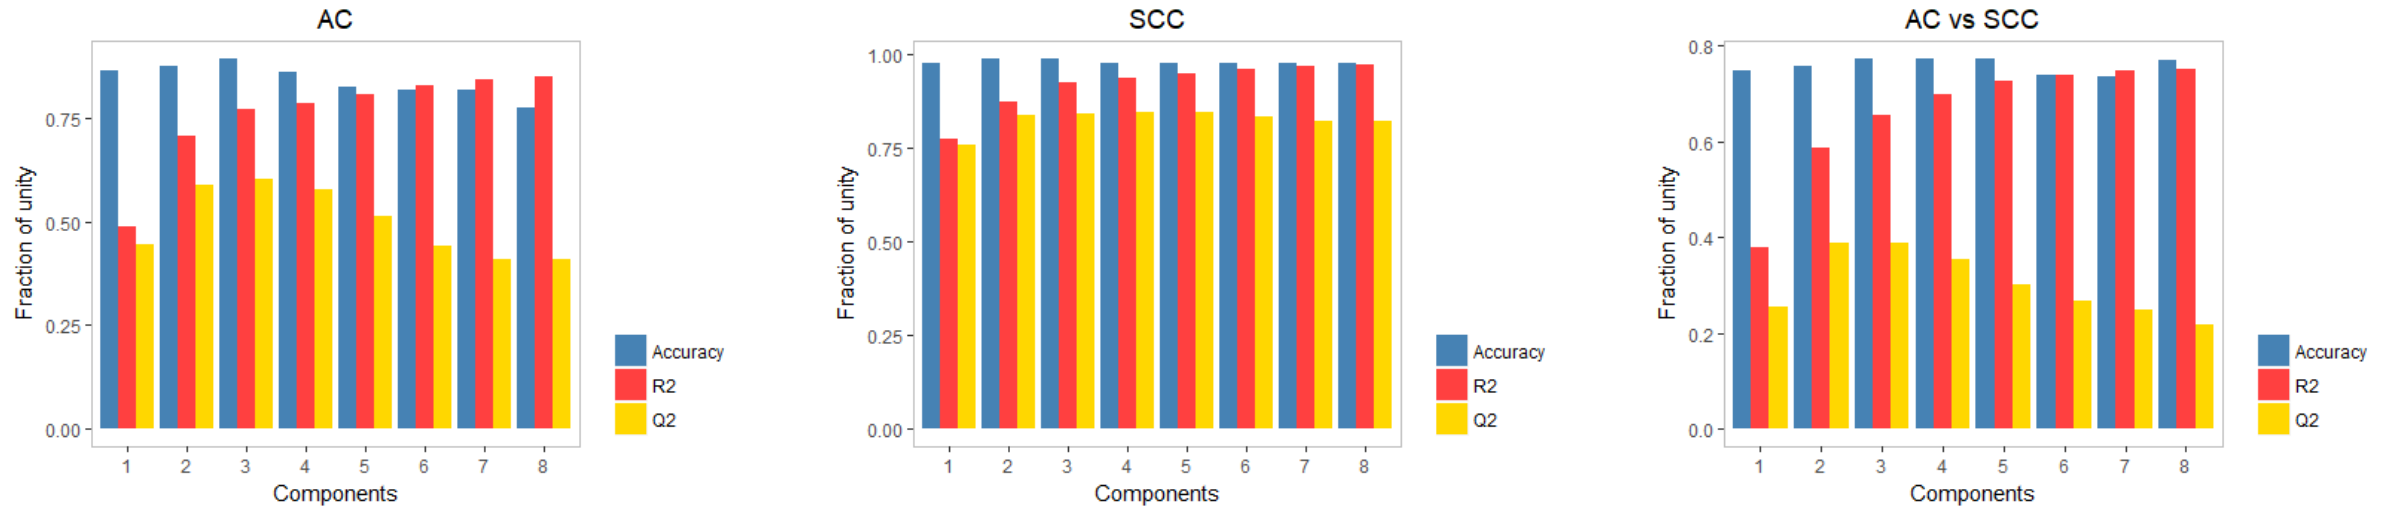

**Fig. S3. PLS-DA models.** Performance indicators expressed in terms of accuracy, goodness of fit ( $R^2$ ) and prediction ( $Q^2$ ) for combination of components for the three PLS-DA models discriminating adenocarcinoma (AC) lung tissue versus control tissue, squamous lung carcinoma tissue (SCC) versus control tissue, and AC versus SCC lung tissues.
