# Supplementary material for: Metabolomic profiling of human lung tumor tissues – nucleotide metabolism as a candidate for therapeutic interventions and biomarkers
Source: PubMed Central journal article supplement (PMC6165994; doi:10.1002/1878-0261.12369), 2018-09-13
Supplement: MOL2-12-1778-s004.pdf [file MOL2-12-1778-s004.pdf]

| Symbol        | Name                                     |
|---------------|------------------------------------------|
| <i>ADA</i>    | Adenosine deaminase                      |
| <i>IMPDH2</i> | Inosine-5'-monophosphate dehydrogenase 2 |
| <i>GMPS</i>   | Guanosine monophosphate synthetase       |
| <i>GMPR</i>   | Guanosine Monophosphate Reductase        |
| <i>XDH</i>    | Xanthine dehydrogenase                   |
| <i>ATIC</i>   | IMP cyclohydrolase                       |
| <i>HPRT1</i>  | Hypoxanthine Phosphoribosyltransferase 1 |
| <i>ITPA</i>   | Inosine triphosphate pyrophosphatase     |
| <i>ADSL</i>   | Adenylosuccinate lyase                   |
| <i>ADSS</i>   | Adenylosuccinate synthase                |

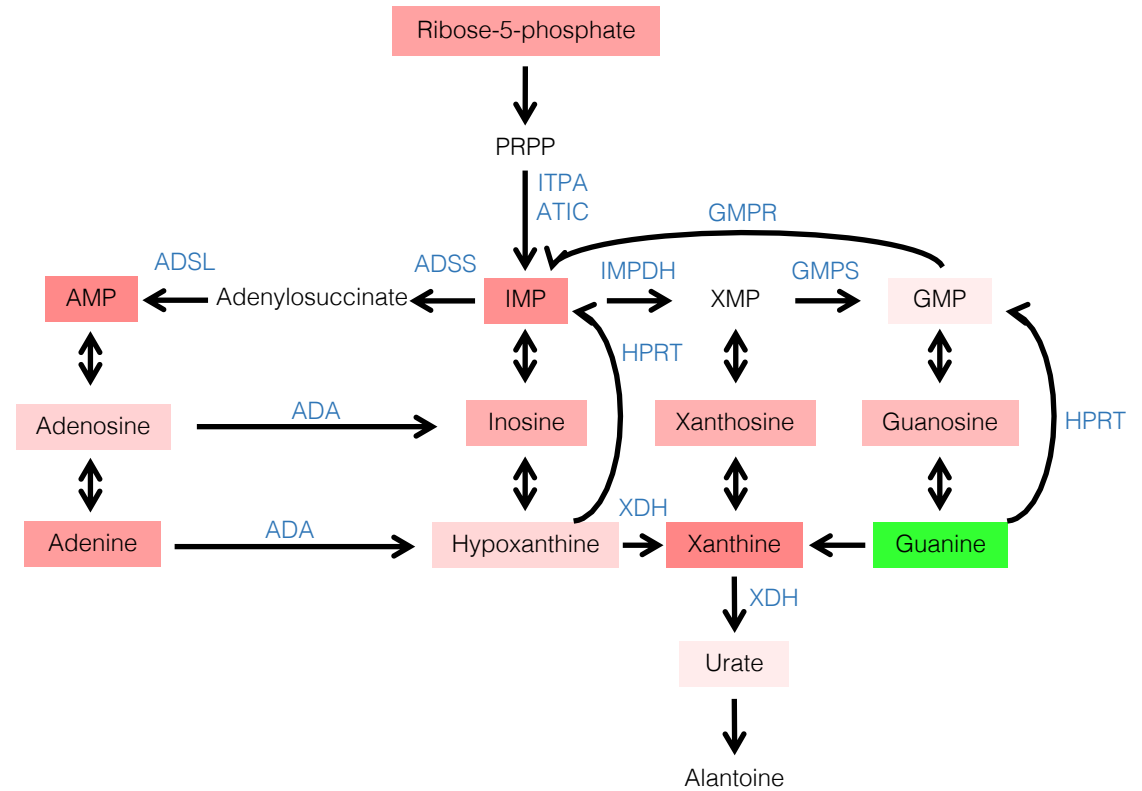

**Fig. S4. Enzymes involved in the regulation of purine catabolism.** Enzymes analyzed involved in the Nucleotide metabolism pathway.
